# Supplementary material for: Naphthalene-based water-soluble fluorescent boronic acid isomers suitable for ratiometric and off-on sensing of saccharides at physiological pH
Source: Royal Society of Chemistry journal article supplement (doi:10.1039/b413376e), 2005-01-01
Supplement: b413376e.pdf [file b413376e.pdf]

# Supplementary Material (ESI) for New Journal of Chemistry  
# This journal is © The Royal Society of Chemistry and  
# The Centre National de la Recherche Scientifique, 2005

## Supporting Information

### **Naphthalene-based Water-soluble Fluorescent Boronic Acids Suitable for Ratiometric and Off-on Sensing of Saccharides at Physiological pH**

Xingming Gao, Yanling Zhang, and Binghe Wang\*

*Department of Chemistry and Center for Drug Design, Georgia State University, Atlanta, GA  
30303. Fax: 404 654 5827; Tel: 404 651 0289; Email: wang@gsu.edu*

**$^1\text{H}$  and  $^{13}\text{C}$  NMR spectra of 5-DMANBA (1) and related intermediates**

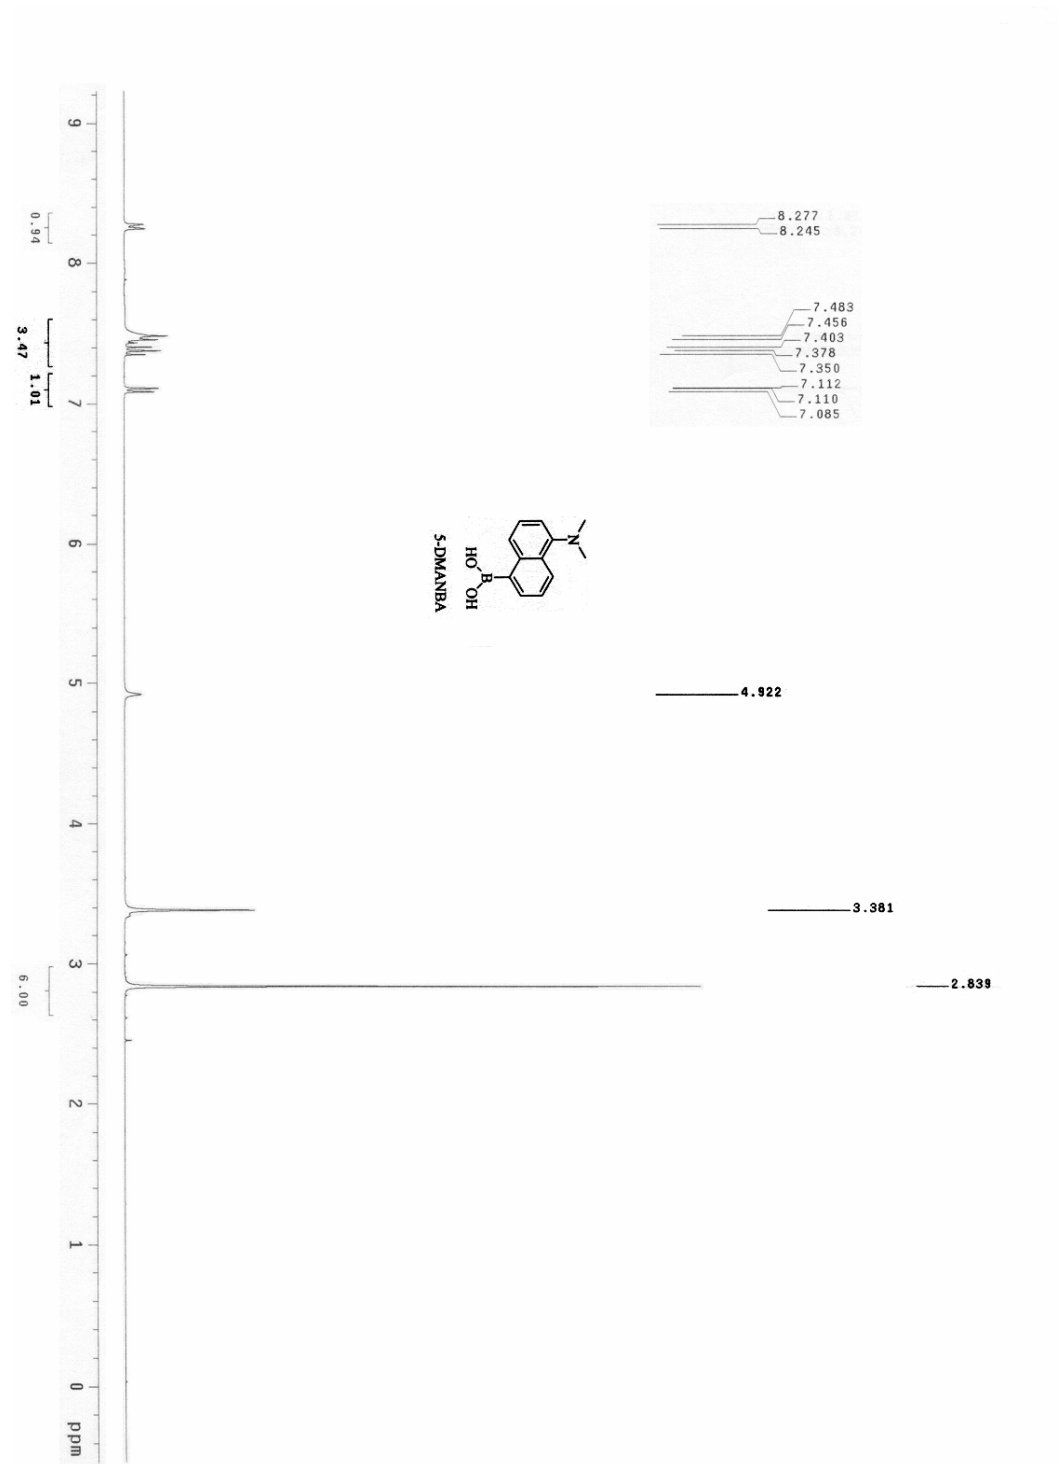

**Figure S1.**  $^1\text{H}$  NMR of 5-DMANBA (1) (300 MHz,  $\text{CD}_3\text{OD}$ )

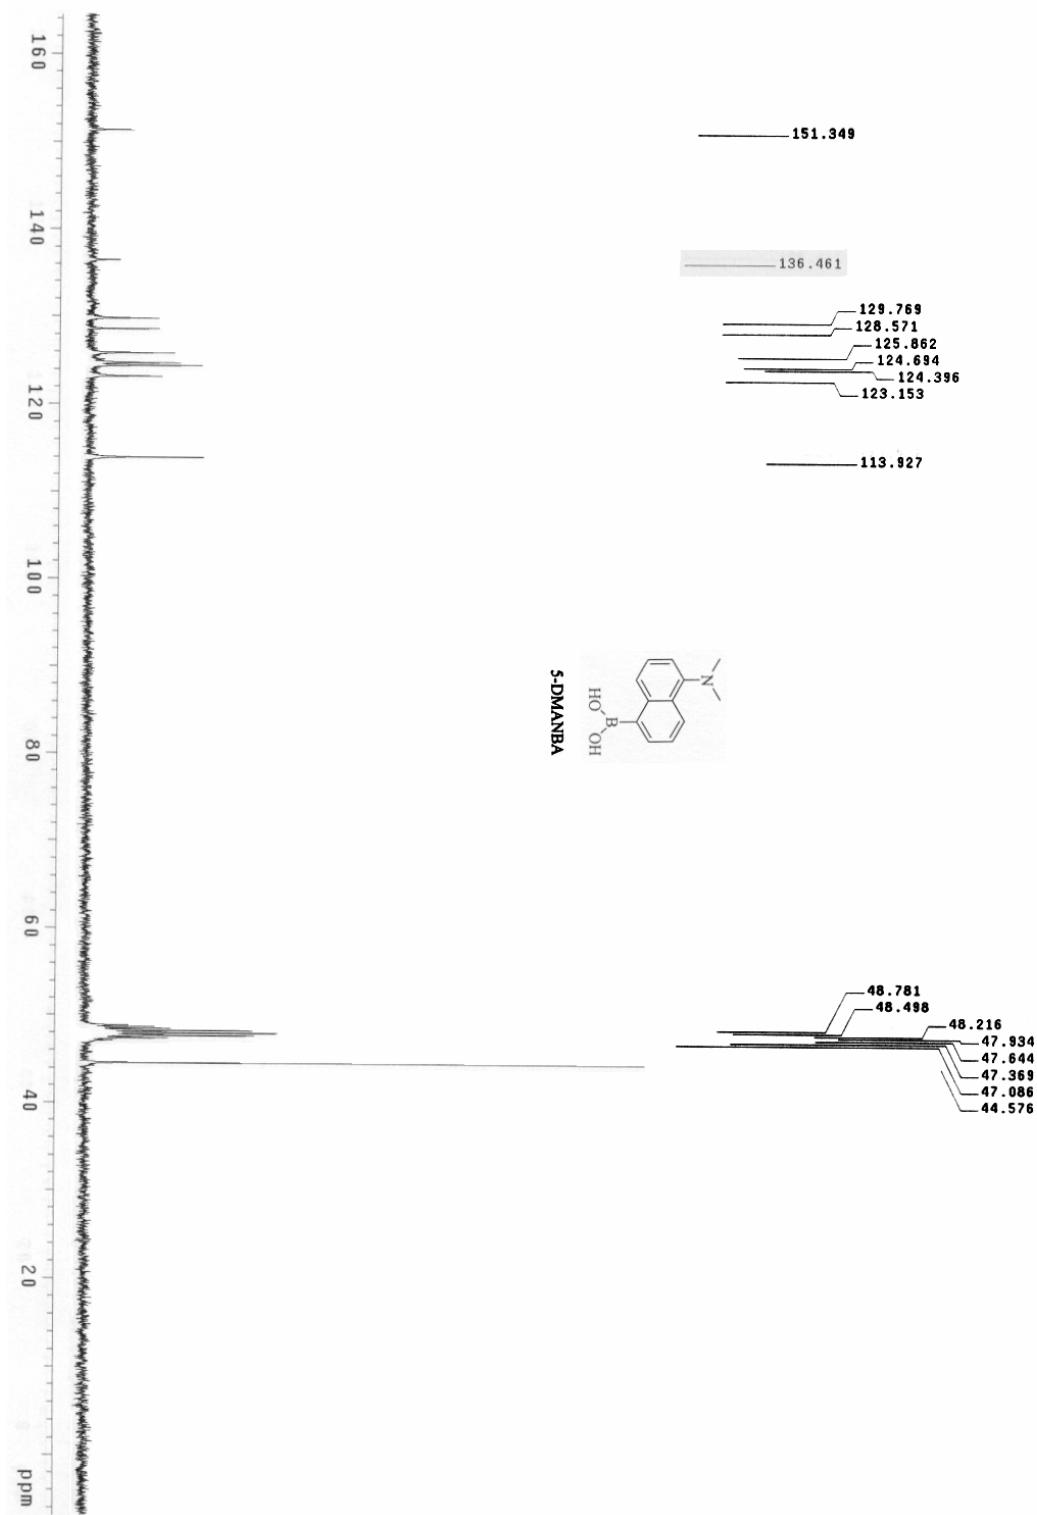

Figure S2.  $^{13}\text{C}$  NMR of 5-DMANBA (1) (75 MHz,  $\text{CD}_3\text{OD}$ )

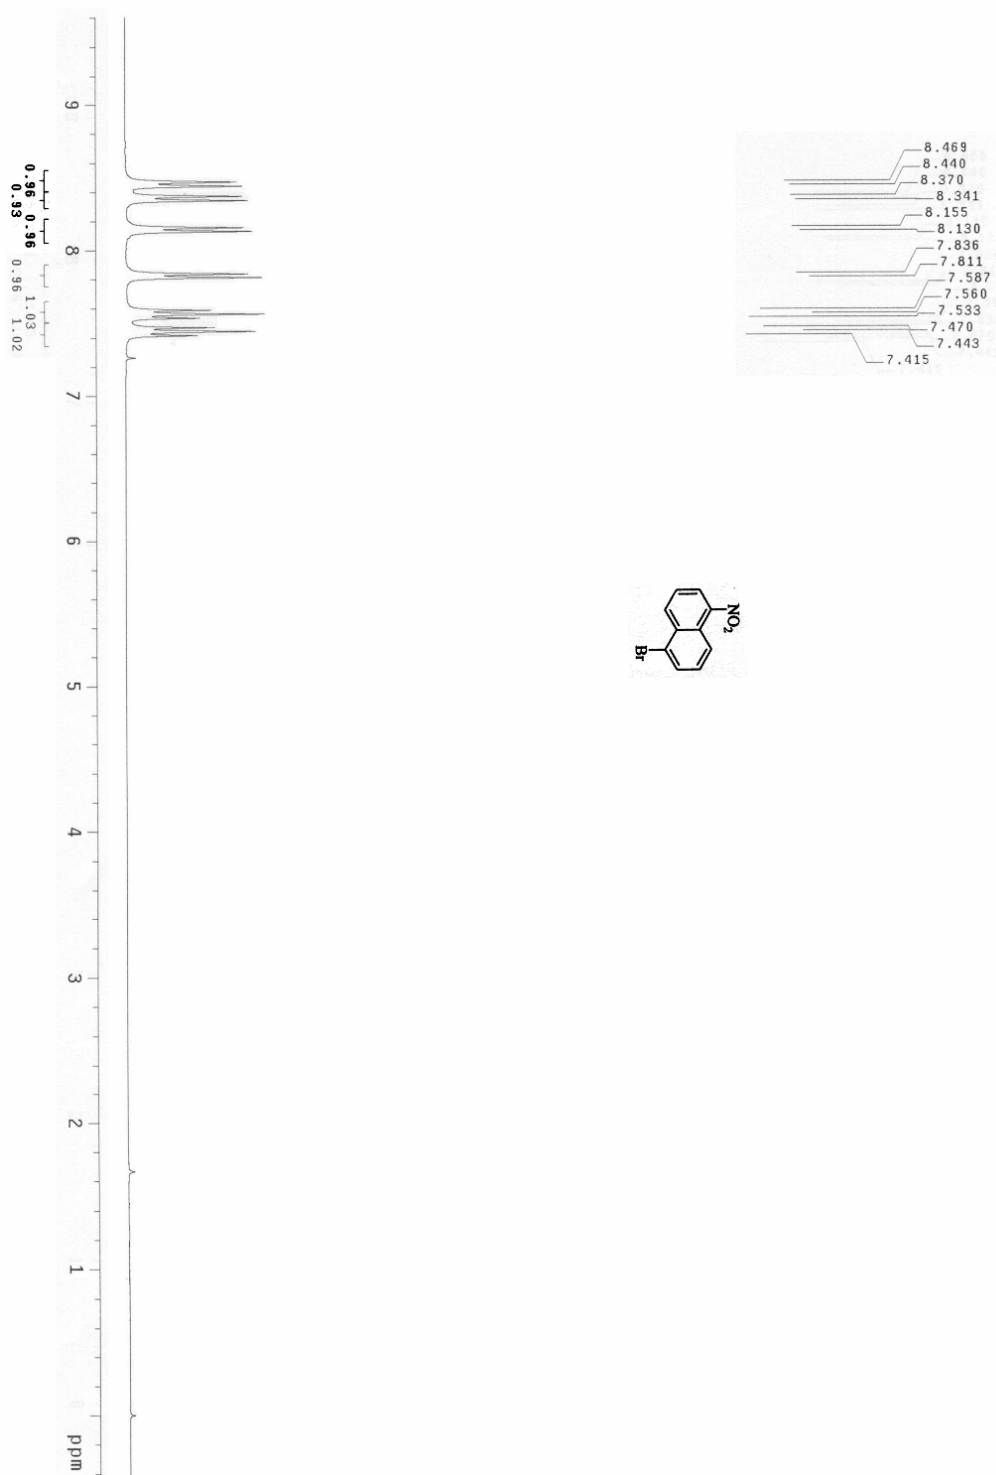

**Figure S3.**  $^1\text{H}$  NMR of 5-nitro-1-bromonaphthalene (**4**) (300 MHz,  $\text{CDCl}_3$ )

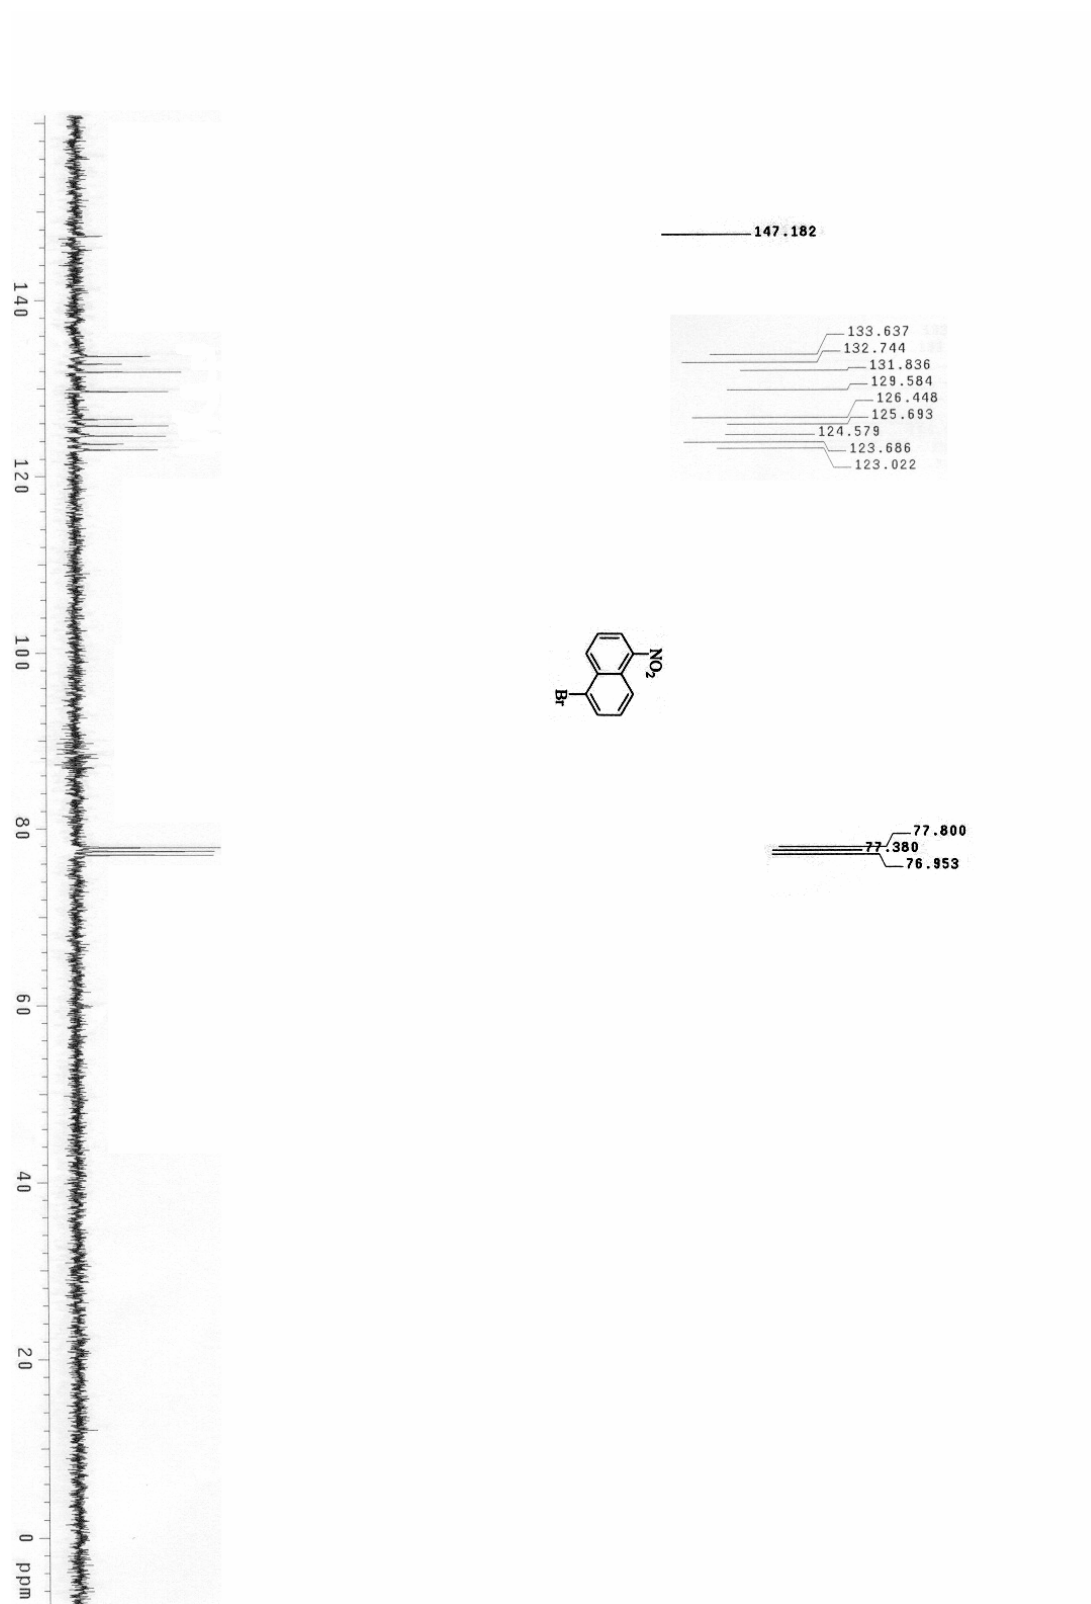

**Figure S4.**  $^{13}\text{C}$  NMR of 5-nitro-1-bromonaphthalene (**4**) (75 MHz,  $\text{CDCl}_3$ )

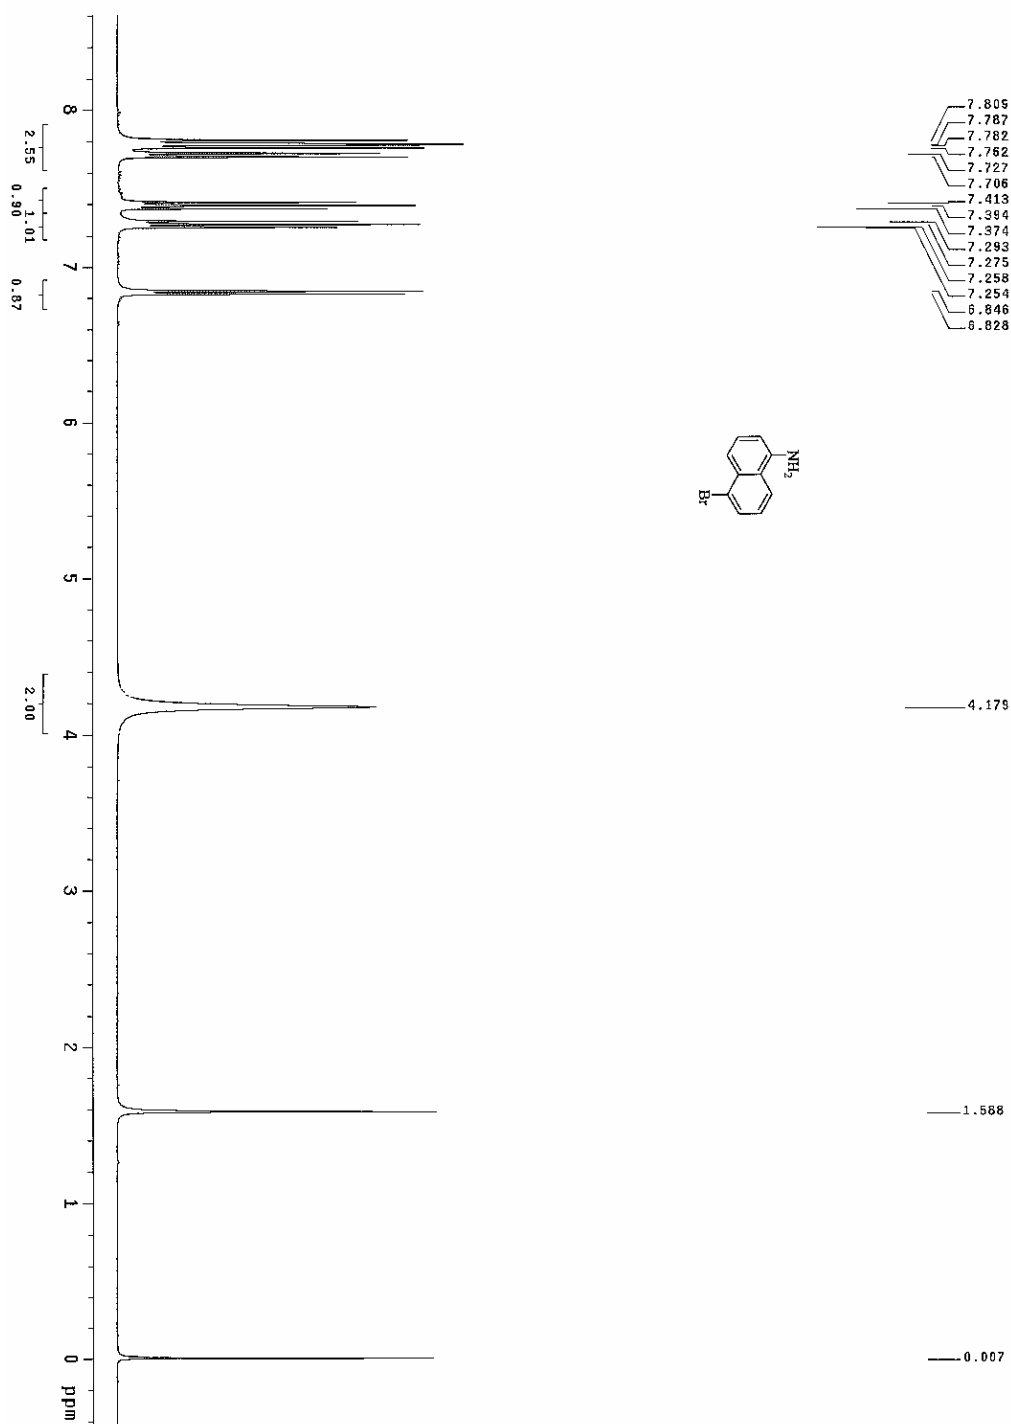

Figure S5. <sup>1</sup>H NMR of 5-amino-1-bromonaphthalene (5) (400 MHz, CDCl<sub>3</sub>)

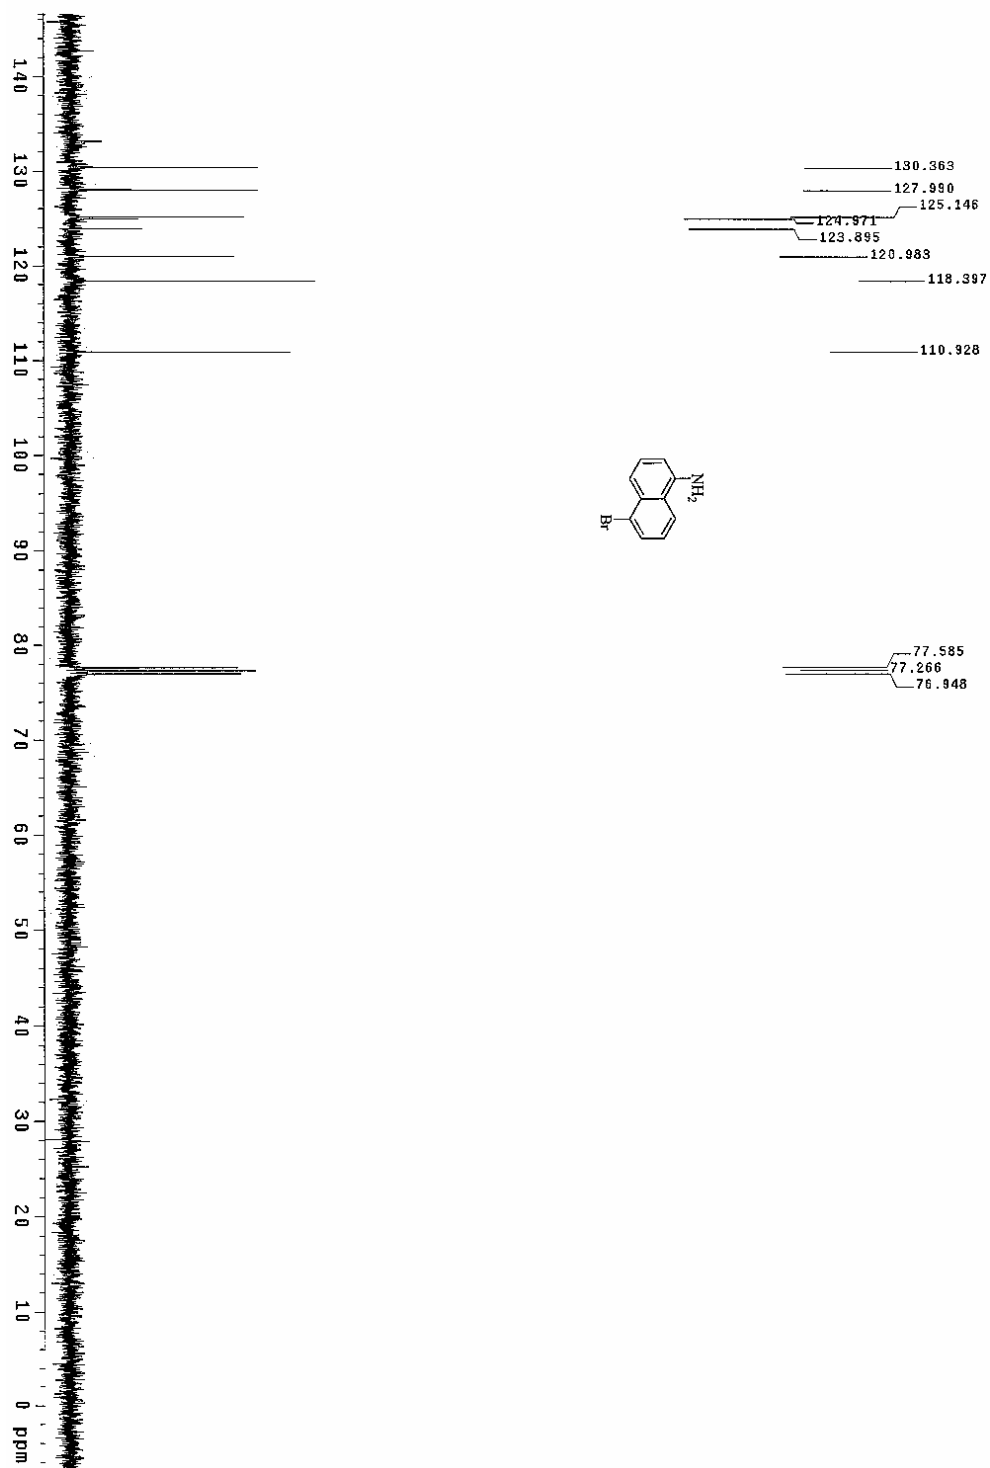

Figure S6.  $^{13}\text{C}$  NMR of 5-amino-1-bromonaphthalene (5) (100 MHz,  $\text{CDCl}_3$ )

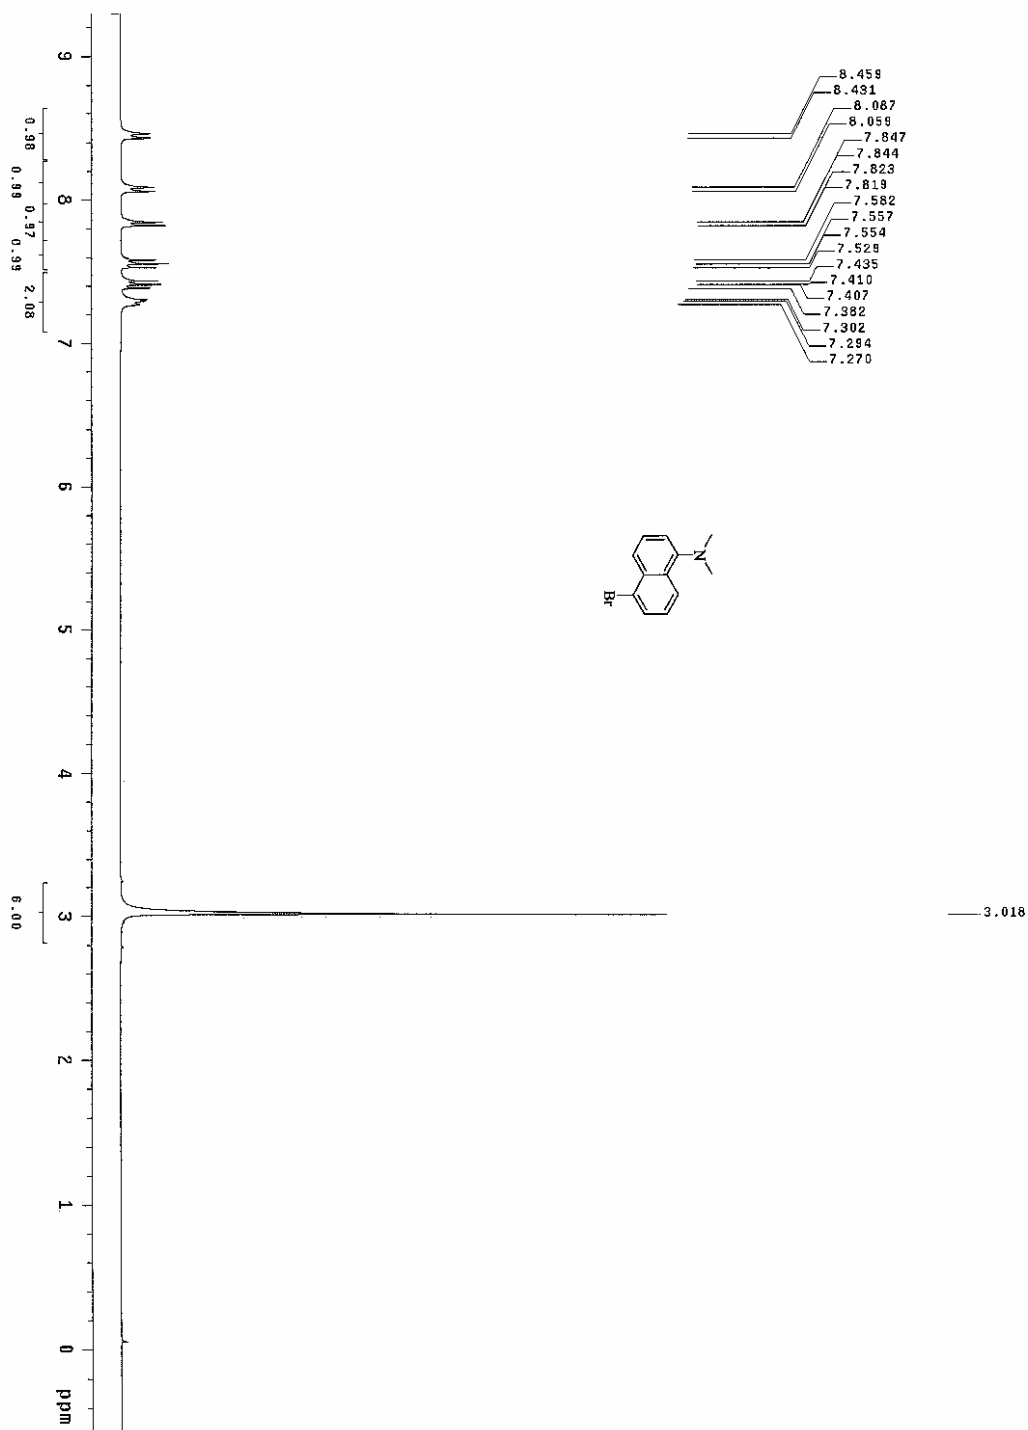

Figure S7. <sup>1</sup>H NMR of 5-(dimethylamino)-1-bromonaphthalene (6) (300 MHz, CDCl<sub>3</sub>)



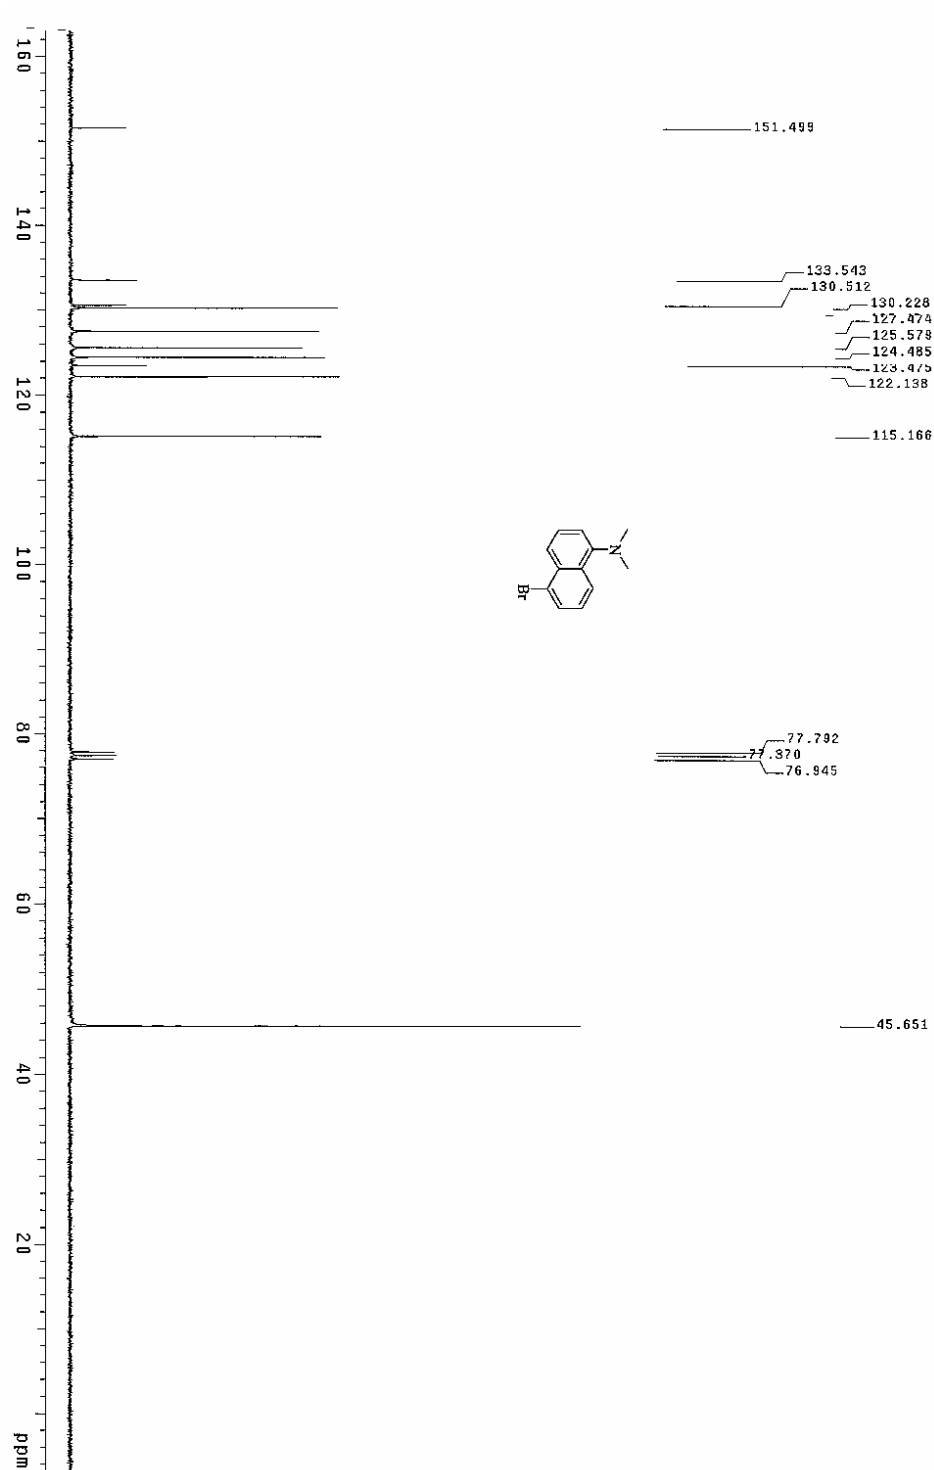

Figure S8.  $^{13}\text{C}$  NMR of 5-(dimethylamino)-1-bromonaphthalene (6) (75 MHz,  $\text{CDCl}_3$ )

# Supplementary Material (ESI) for New Journal of Chemistry  
# This journal is © The Royal Society of Chemistry and  
# The Centre National de la Recherche Scientifique, 2005
